# Supplementary material for: Morphological and Molecular Functional Evidence of the Pharyngeal Sac in the Digestive Tract of Silver Pomfret, Pampus argenteus
Source: MDPI journal article supplement (doi:10.3390/ijms24021663), 2023-01-14
Supplement: s1 [file s1]

# Supplementary Material

## 1 Supplementary Figures and Tables

### 1.1 Supplementary Figures

#### Supplementary Figure S1 De novo transcriptome assembly and annotation of *P. argenteus*.

(A) BUSCO assessment results. (B) Pearson correlation analysis. Ps and E indicate the pharyngeal sac and the esophagus, respectively. (C) The unigenes annotation of seven databases. (D) Venn diagram from annotation results from five databases.

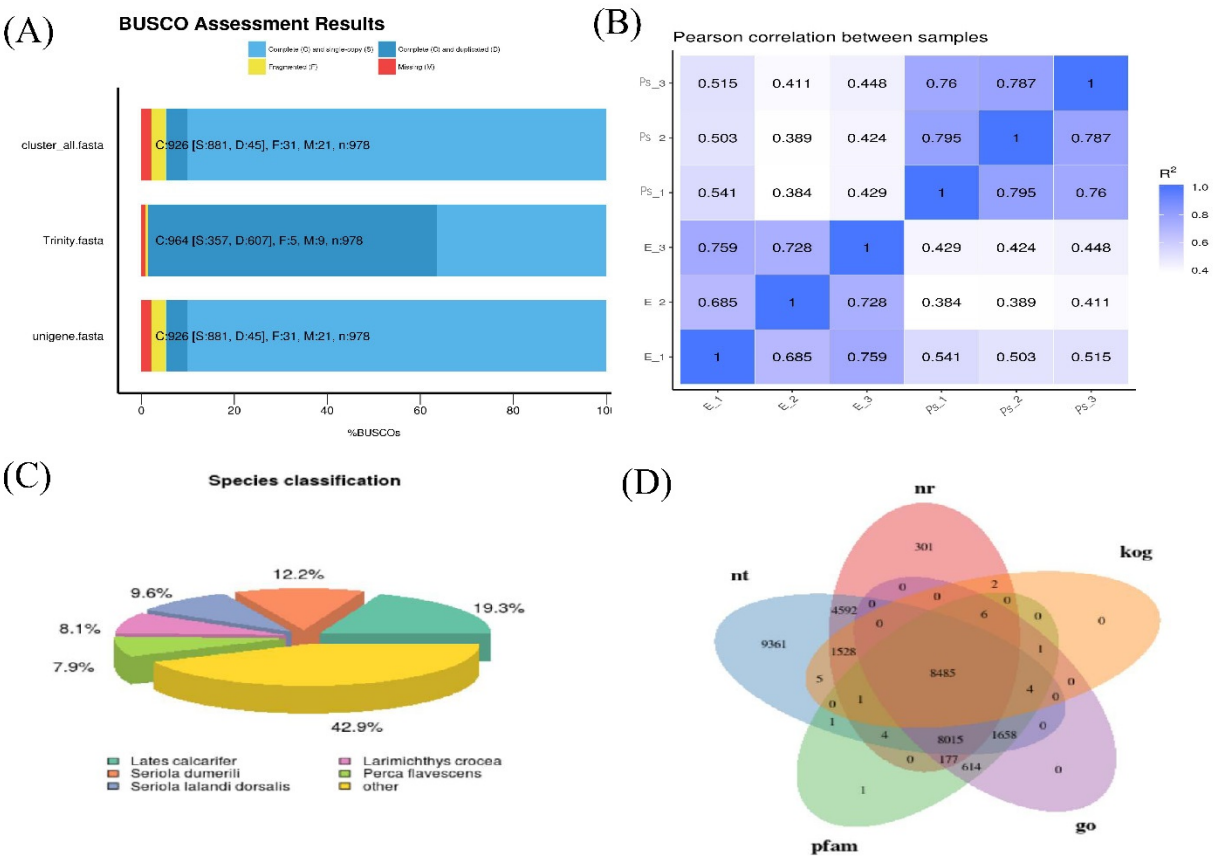

**Supplementary Figure S2 Gene Ontology (GO) classifications of all unigenes from pharyngeal sac of *P. argenteus*.**

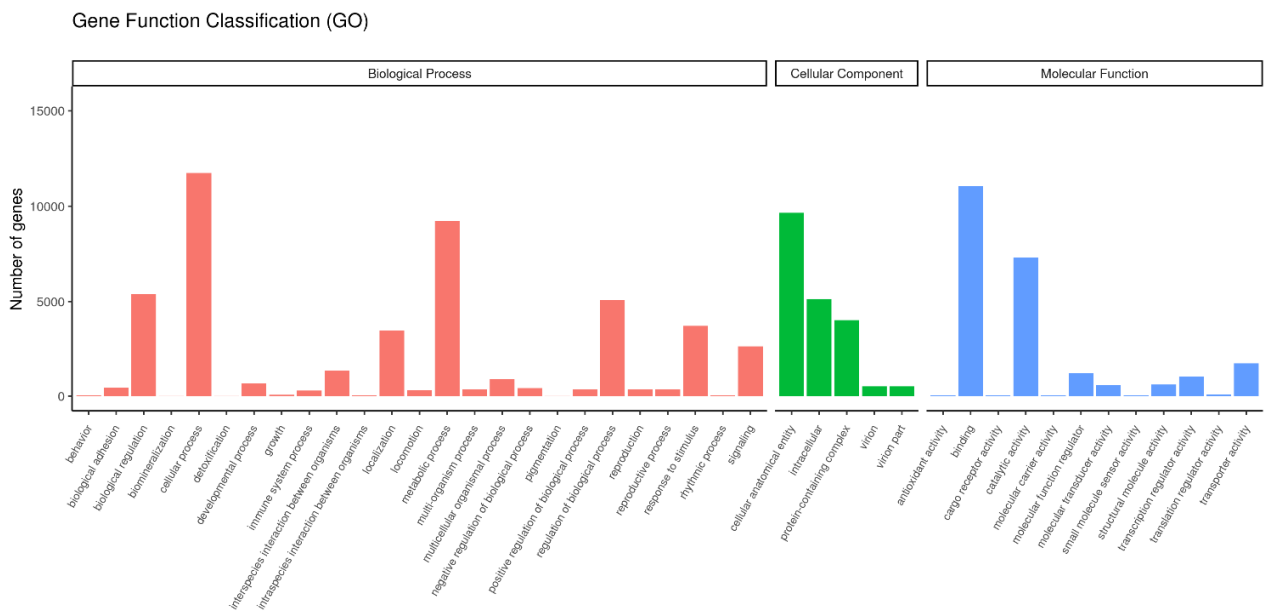

**Supplementary Figure S3 Kyoto Encyclopedia of Genes and Genomes (KEGG) classifications.**

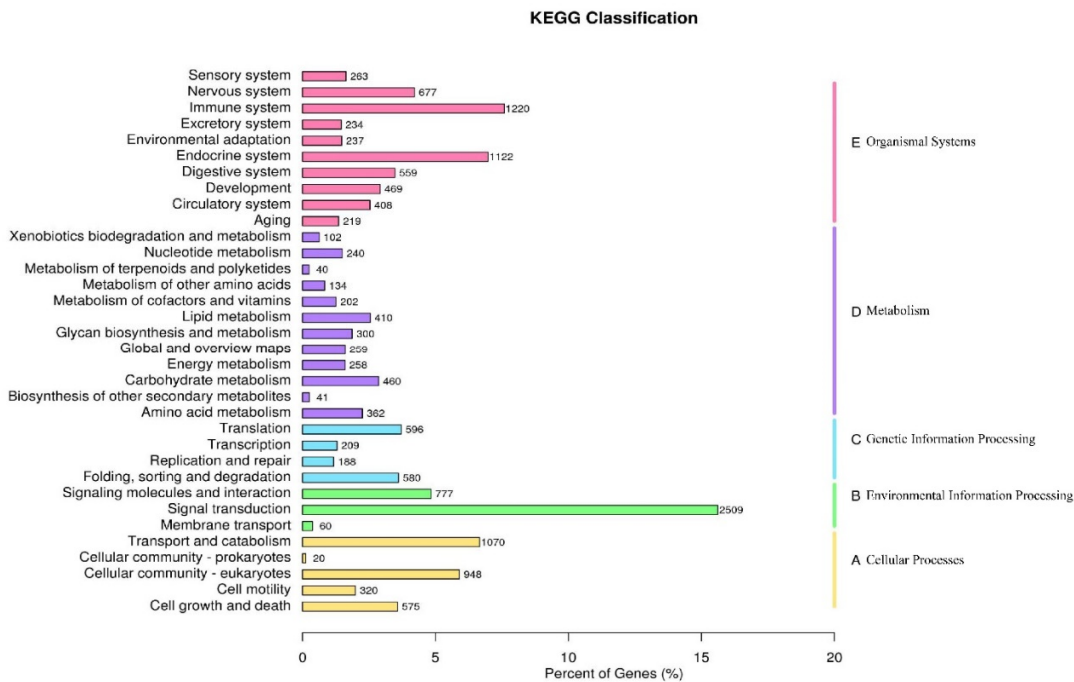

Supplementary Figure S4 Clusters of Orthologous Groups of proteins (KOG) function classification.

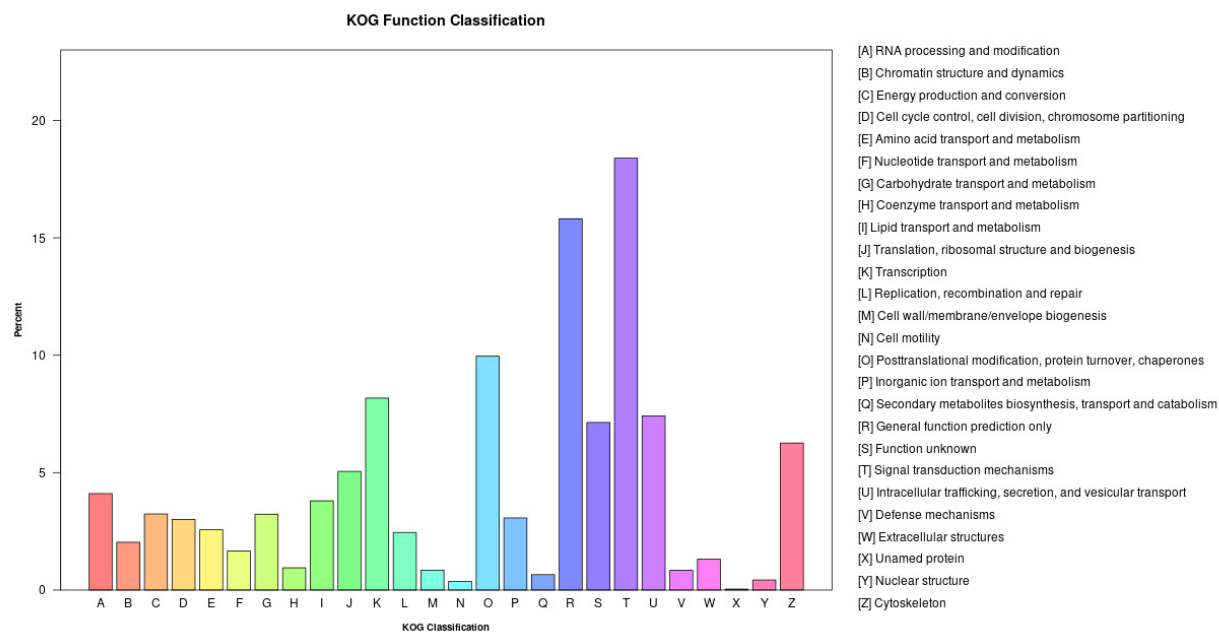

1.2 Supplementary Tables

Supplementary Table S1 Statistics of sample comparison

| Sample name | Total reads | Total mapped     |
|-------------|-------------|------------------|
| E_1         | 21389250    | 16150441(75.51%) |
| E_2         | 23789510    | 16915448(71.10%) |
| E_3         | 23169591    | 17136386(73.96%) |
| Ps_1        | 19896859    | 15594954(78.38%) |
| Ps_2        | 22190761    | 17256919(77.77%) |
| Ps_3        | 20482075    | 15453665(75.45%) |

**Supplementary Table S2 The length distribution of transcripts and unigenes.**

| <b>The numbers of transcripts and unigenes for different types of length intervals</b> |            |             |               |            |        |           |
|----------------------------------------------------------------------------------------|------------|-------------|---------------|------------|--------|-----------|
| Transcript length interval                                                             | 300-500bp  | 500-1kbp    | 1k-2kbp       | >2kbp      | Total  |           |
| Number of transcripts                                                                  | 20320      | 20146       | 26814         | 38205      | 105485 |           |
| Number of unigenes                                                                     | 12420      | 9638        | 8104          | 11521      | 41683  |           |
| <b>The length distribution of transcripts and unigenes</b>                             |            |             |               |            |        |           |
|                                                                                        | Min Length | Mean Length | Median Length | Max Length | N50    | N90       |
| Transcripts                                                                            | 301        | 1898        | 1414          | 48909      | 2910   | 921       |
| Unigenes                                                                               | 301        | 1587        | 896           | 48909      | 2788   | 602       |
|                                                                                        |            |             |               |            |        | Total     |
|                                                                                        |            |             |               |            |        | 200177226 |
|                                                                                        |            |             |               |            |        | 66135292  |

**Supplementary Table S3 Statistics of transcription factors.**

| <b>Tf Family</b> | <b>KO Name</b> | <b>Description</b>                                  | <b>Log<sub>2</sub>Fold Change</b> | <b>Padj</b> | <b>Up/Down</b> |
|------------------|----------------|-----------------------------------------------------|-----------------------------------|-------------|----------------|
| PAX              | PAX1/9         | paired box protein 1/9                              | 12.753                            | 2.8106E-22  | Up             |
|                  | PAX3/7         | paired box protein 3/7                              | 7.0428                            | 0.000019304 | Up             |
| ZBTB             | KLHL3/1        | kelch-like protein 3/1                              | 12.233                            | 3.4936E-18  | Up             |
|                  | KBTBD5/10      | kelch repeat and BTB domain-containing protein 5/10 | 10.973                            | 1.2531E-13  | Up             |
|                  | ABTB2          | ankyrin repeat and BTB domain containing 2          | 3.2785                            | 1.0764E-08  | Up             |
| bHLH             | MYF4           | myogenic factor 4                                   | 10                                | 1.0139E-12  | Up             |
|                  | LMYC           | L-myc proto-oncogene protein                        | 2.4812                            | 0.00010659  | Up             |
| Homeobox         | PITX2          | paired-like homeodomain transcription factor 2      | 9.129                             | 5.8639E-18  | Up             |
|                  | HOX4           | homeobox 4                                          | 5.1656                            | 5.0792E-09  | Up             |

|          |       |                                 |         |            |      |
|----------|-------|---------------------------------|---------|------------|------|
| T-box    | TBX5  | T-box protein 5                 | -8.2013 | 4.5989E-44 | Down |
|          | TBX4  | T-box protein 4                 | -6.0419 | 1.4268E-13 | Down |
| ESR-like | ESRRG | estrogen-related receptor gamma | -7.6689 | 1.6097E-20 | Down |
| CSD      | YBX2  | Y-box-binding protein 2         | -7.5534 | 6.9171E-41 | Down |
| zf-GATA  | GATA5 | GATA-binding protein 5          | -6.9958 | 2.7355E-20 | Down |
|          | GATA6 | GATA-binding protein 6          | -6.5897 | 3.1671E-39 | Down |

**Supplementary Table S4 Part of the DEGs.**

| Gene Name | Description                       | Log <sub>2</sub> FoldChange | Padj       | Up/Down |
|-----------|-----------------------------------|-----------------------------|------------|---------|
| KRT8      | keratin 8                         | 4.996                       | 6.47E-06   | Up      |
| KRT13     | keratin13                         | 9.2607                      | 1.15E-05   | Up      |
| MSLN      | mesothelin                        | 3.1821                      | 0.001473   | Up      |
| MUC5A     | mucin 5AC                         | 8.8769                      | 1.73E-23   | Up      |
| PGA       | pepsin A                          | -13.229                     | 2.12E-54   | Down    |
| GGH       | gamma-glutamyl hydrolase          | -9.7675                     | 1.9737E-29 | Down    |
| AMCase    | acidic mammalian chitinase        | -12.759                     | 2.18E-67   | Down    |
| SLC6A18   | solute carrier family 6-member 18 | -12.297                     | 7.6475E-20 | Down    |
| PRSS2     | serine protease 2                 | -8.707                      | 1.11E-18   | Down    |
| PRSS3     | trypsin-3-like                    | -8.9744                     | 1.2839E-06 | Down    |

Supplementary Material

|        |                                                       |         |             |      |
|--------|-------------------------------------------------------|---------|-------------|------|
| CTRA   | chymotrypsin A                                        | -9.4016 | 1.4918E-08  | Down |
| CTRB   | chymotrypsin B                                        | -9.2122 | 2.403E-21   | Down |
| CPAA2  | carboxypeptidase A2                                   | -8.6516 | 3.0157E-17  | Down |
| CPAB   | carboxypeptidase B                                    | -6.6772 | 6.6316E-14  | Down |
| CPAA1  | carboxypeptidase A1-like                              | -5.3928 | 6.9695E-10  | Down |
| AMY    | pancreatic alpha-amylase                              | -9.664  | 2.3555E-08  | Down |
| APOE   | apolipoprotein E                                      | 7.132   | 3.16E-31    | Up   |
| APOL3  | apolipoprotein L3                                     | 6.9701  | 2.46E-32    | Up   |
| LRP1   | low-density lipoprotein receptor<br>related protein 1 | 3.0946  | 4.62E-16    | Up   |
| LDRL   | low-density lipoprotein receptor                      | 4.4959  | 3.67E-07    | Up   |
| FASN   | fatty Acid Synthase                                   | 2.5978  | 2.69E-09    | Up   |
| MRC    | mannose receptor C                                    | 10.246  | 4.45E-08    | Up   |
| TOLLIP | toll-interacting protein                              | 4.4659  | 6.4884E-42  | Up   |
| TLR3   | toll-like receptor 3                                  | 3.6502  | 4.6436E-07  | Up   |
| IGHM   | immunoglobulin M heavy chain                          | 2.4397  | 4.8815E-06  | Up   |
| MYH    | myosin heavy chain                                    | 5.7828  | 2.78E-14    | Up   |
| MYLPF  | myeloid cell leukemia1                                | 12.158  | 1.2262E-46  | Up   |
| DES    | desmin                                                | 8.2848  | 3.7888E-31  | Up   |
| MYL4   | myosin light chain 4                                  | 9.5317  | 0.000054225 | Up   |

|         |                               |         |            |      |
|---------|-------------------------------|---------|------------|------|
| FLNA    | filamin A                     | 2.5721  | 1.19E-07   | Up   |
| CLDN7   | claudin 7                     | 5.6693  | 7.17E-13   | Up   |
| COL1A   | collagen type I alpha 1 chain | 2.2579  | 5.17E-06   | Up   |
| COL10A1 | collagen type X alpha 1 chain | 13.666  | 3.49E-23   | Up   |
| MEP1B   | meprin A subunit beta         | 10.185  | 7.8035E-44 | Up   |
| WNT5    | wnt family member 5           | 2.9135  | 2.69E-07   | Up   |
| WNT2    | wnt family member 2           | -7.4718 | 1.58E-22   | Down |
| TBX5    | T-box transcription factor 5  | -8.2013 | 4.5989E-44 | Down |
| TBX4    | T-box transcription factor 4  | -6.0419 | 1.4268E-13 | Down |
| TBX1    | T-box transcription factor 1  | 3.8038  | 1.15E-09   | Up   |
| PAX9    | paired box 9                  | 12.753  | 2.81E-22   | Up   |

---
